# Supplementary material
Source: Springer Nature journal article supplement (https://www.springermedizin.de/resource/supplementary/12875_2010_479_MOESM3_ESM.pdf/9434704)
Supplement: MOESM3 [file 9434704]

**160 patients from 30 practices = 4800**

**25% responses = 1200 patients**

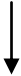

**Randomisation of the practices**

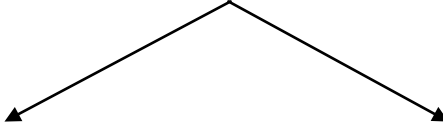

**Intervention Group**

**Control Group**

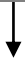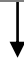

**Baseline**

600 patients (360 high risk)

**Baseline**

600 patients (360 high risk)

120 loss to follow up

120 loss to follow up

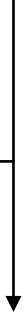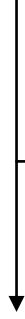

**12 months**

480 patients (288 high risk)

**12 months**

480 patients (288 high risk)
